# Supplementary material for: Engineering highly active Cd1−xZnxS nanopopcorns via zinc blende/wurtzite phase junctions for enhanced photocatalytic H2 evolution without a co-catalyst
Source: Royal Society of Chemistry journal article supplement (doi:10.1039/d0ta12600d), 2021-01-01
Supplement: d0ta12600d1.pdf [file d0ta12600d1.pdf]

## Electronic supplementary information

### **Engineering highly active $\text{Cd}_{1-x}\text{Zn}_x\text{S}$ nanopopcorns via zinc blende/wurtzite phase junctions for enhanced photocatalytic $\text{H}_2$ evolution without co-catalyst**

Xiaosheng Guo, Chuchu Cheng, Fangshu Xing, Caijin Huang\*

State Key Laboratory of Photocatalysis on Energy and Environment, College of Chemistry, Fuzhou University, Fuzhou 350116, P. R. China.

\*To whom correspondence should be addressed.

*E-mail: cjhuang@fzu.edu.cn*

## Figures

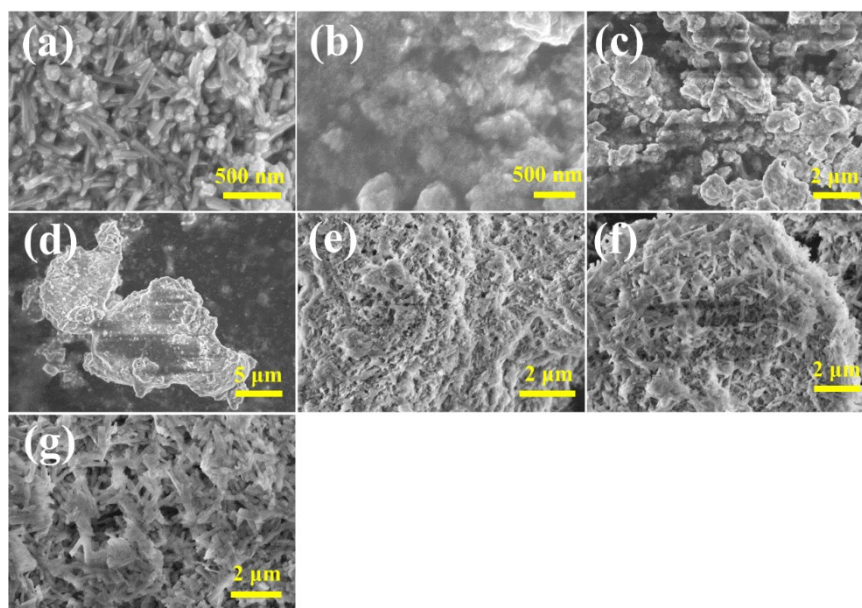

**Fig. S1** SEM images of Cd<sub>1-x</sub>Zn<sub>x</sub>S-10 samples. (a) CdS-10, (b) Cd<sub>0.9</sub>Zn<sub>0.1</sub>S-10, (c) Cd<sub>0.7</sub>Zn<sub>0.3</sub>S-10, (d) Cd<sub>0.5</sub>Zn<sub>0.5</sub>S-10, (e) Cd<sub>0.3</sub>Zn<sub>0.7</sub>S-10, (f) Cd<sub>0.1</sub>Zn<sub>0.9</sub>S-10 and (g) ZnS-10.

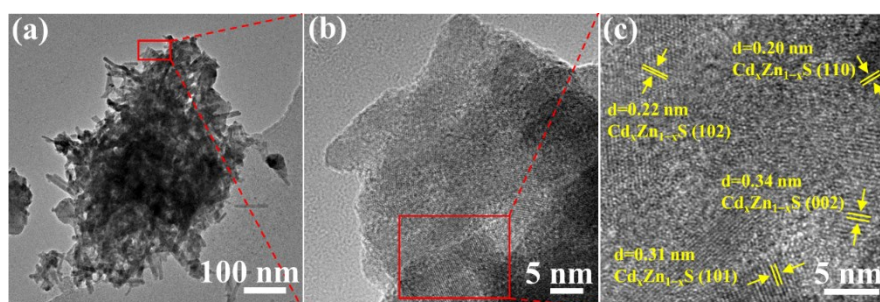

**Fig. S2** (a) TEM and (b and c) HRTEM images of Cd<sub>0.5</sub>Zn<sub>0.5</sub>S-10. The lattice fringes with a spacing of ca. 0.20, 0.22, 0.31 and 0.34 nm can be indexed to the (110), (102), (101) and (002) plane of WZ Cd<sub>1-x</sub>Zn<sub>x</sub>S solid solution, respectively.

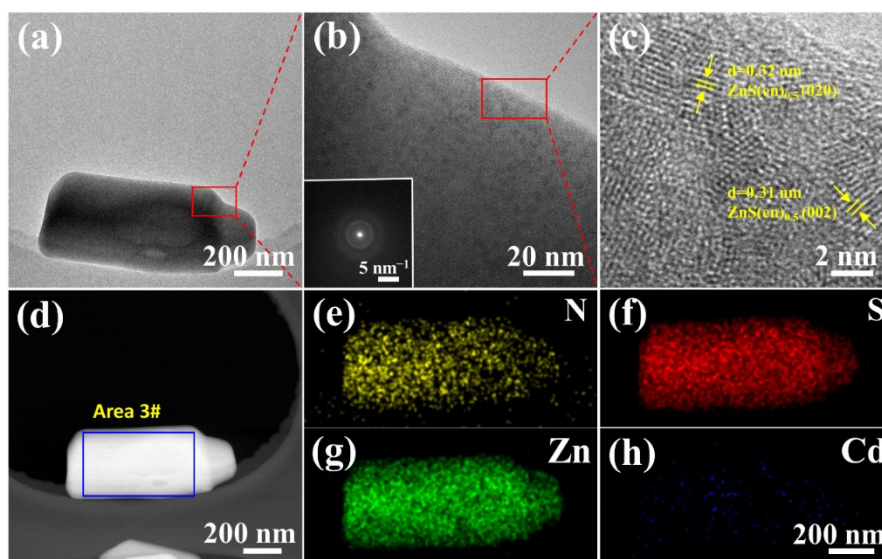

**Fig. S3** (a) TEM, (b and c) HRTEM images of ZnS-16. (d) Dark-field TEM and (e–h) corresponding EDX elemental mapping images of ZnS-16. The inset in b is the SAED pattern of ZnS-16. The lattice fringes with a spacing of ca. 0.31 and 0.32 nm can be indexed to the (002) and (020) plane of  $\text{ZnS(en)}_{0.5}$ ,<sup>1</sup> respectively.

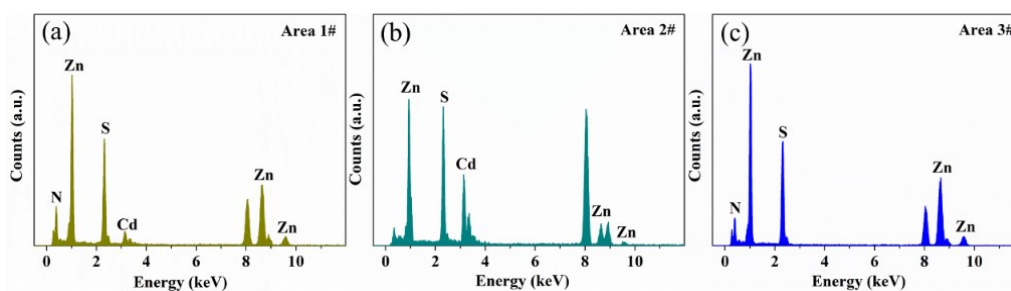

**Fig. S4** EDX spectra of nanoplates, nanopopcorns and ZnS-16 in Area 1# (Fig. 3g), Area 2# (Fig. 3g) and Area 3# (Fig. S3d), respectively.

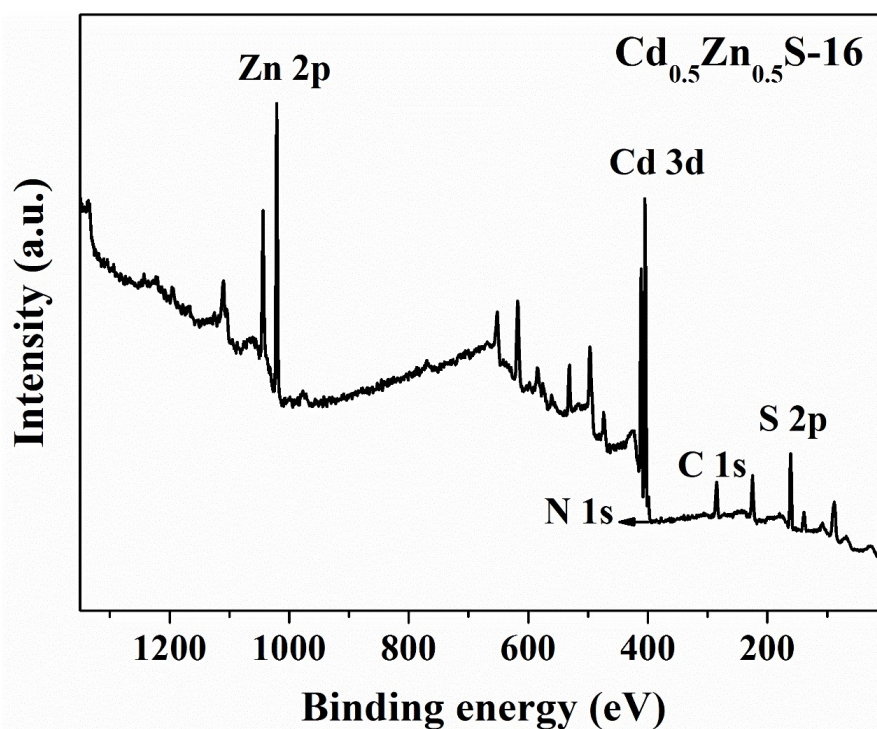

Fig. S5 The overall survey XPS spectrum of Cd<sub>0.5</sub>Zn<sub>0.5</sub>S-16.

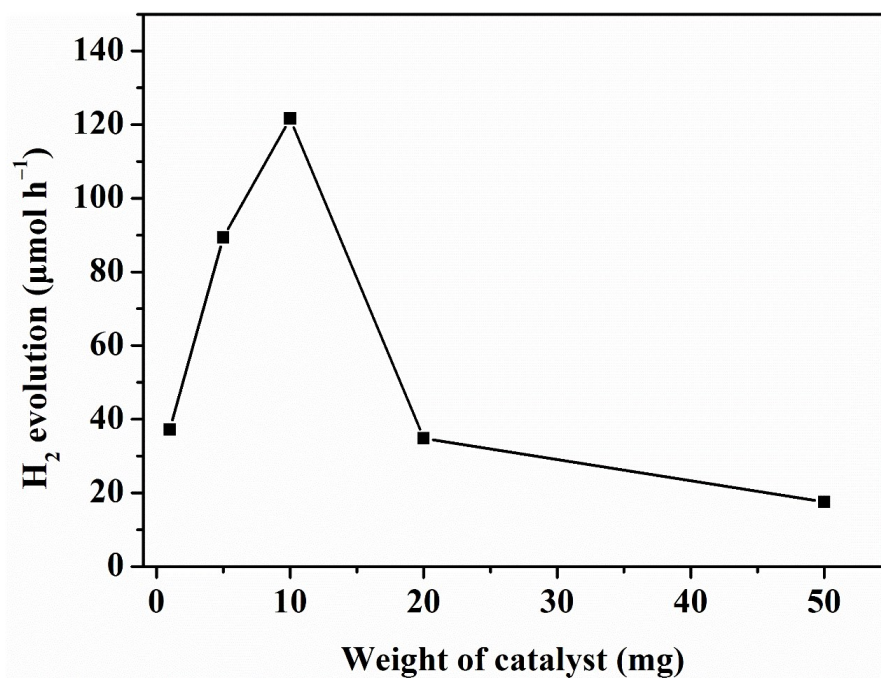

Fig. S6 H<sub>2</sub>-evolution rates of Cd<sub>0.5</sub>Zn<sub>0.5</sub>S-16 with different weights using 420-nm LED light.

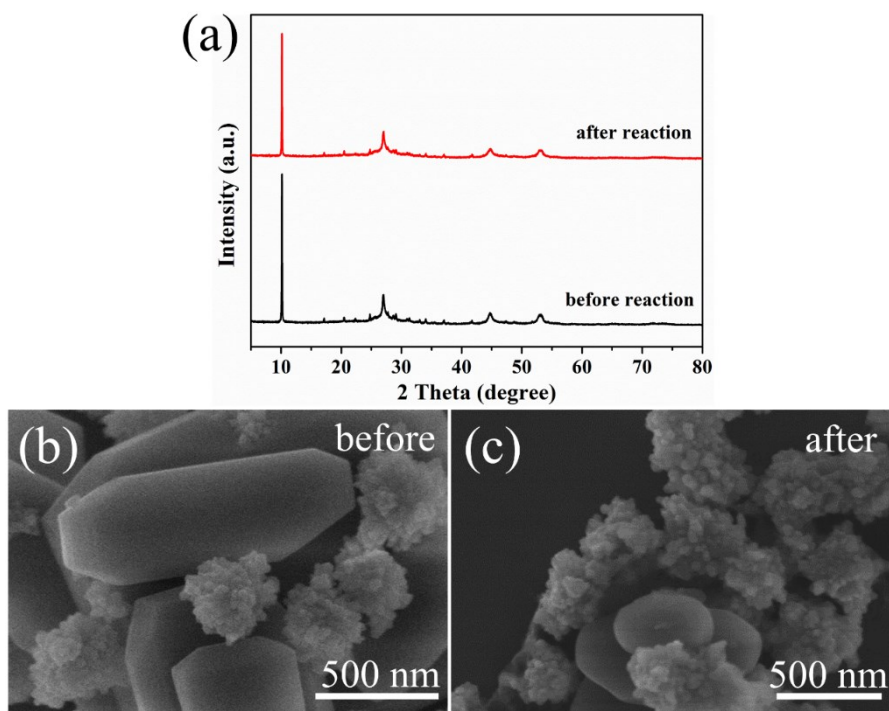

**Fig. S7** (a) XRD patterns and (b–c) SEM images of  $\text{Cd}_{0.5}\text{Zn}_{0.5}\text{S}$ -16 before and after photocatalytic reaction.

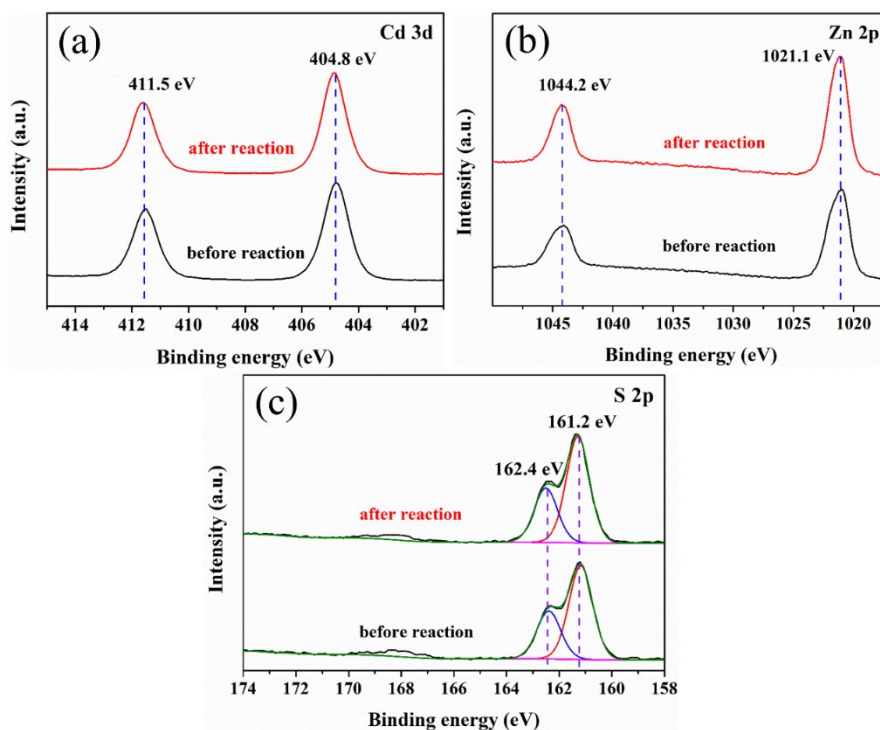

**Fig. S8** XPS spectra of  $\text{Cd}_{0.5}\text{Zn}_{0.5}\text{S}$ -16 before and after photocatalytic reaction. (a) Cd 3d, (b) Zn 2p, and (c) S 2p.



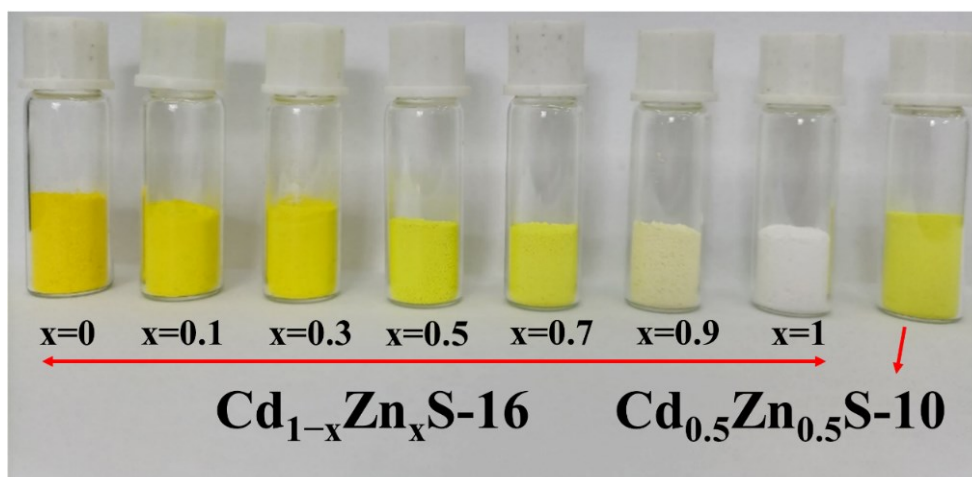

Fig. S9 Photographs of Cd<sub>1-x</sub>Zn<sub>x</sub>S-16 and Cd<sub>0.5</sub>Zn<sub>0.5</sub>S-10.

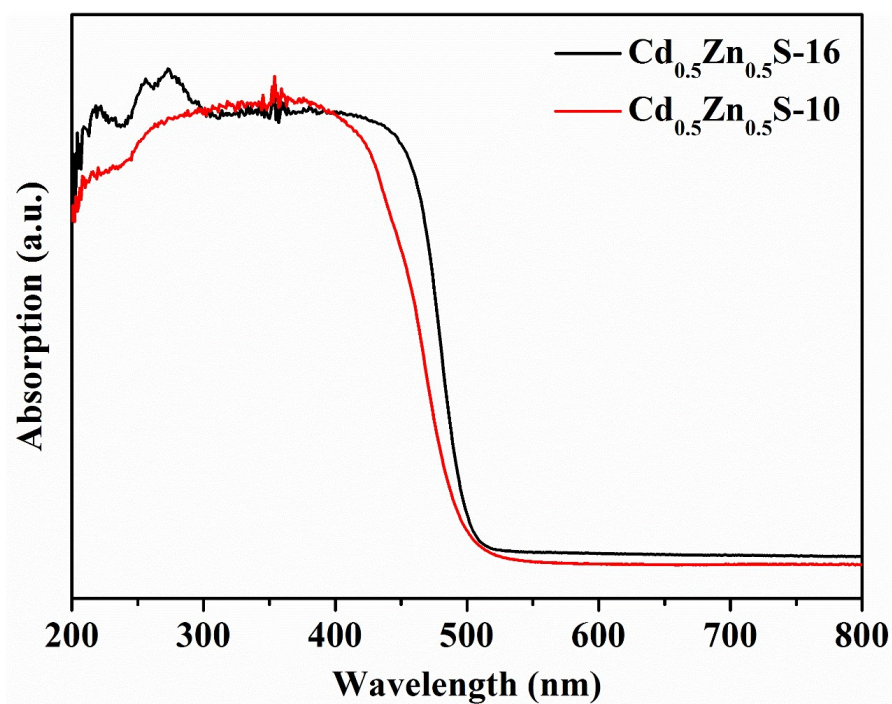

Fig. S10 UV-vis absorption spectra of Cd<sub>0.5</sub>Zn<sub>0.5</sub>S-10 and Cd<sub>0.5</sub>Zn<sub>0.5</sub>S-16.

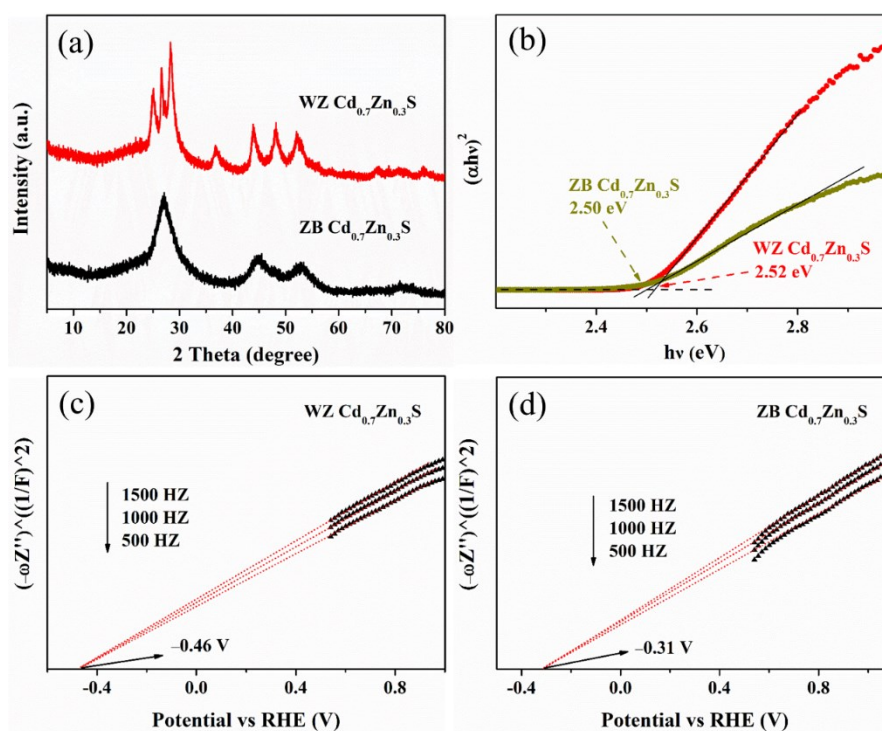

**Fig. S11** (a–b) XRD patterns and determined bandgaps of WZ  $\text{Cd}_{0.7}\text{Zn}_{0.3}\text{S}$  and ZB  $\text{Cd}_{0.7}\text{Zn}_{0.3}\text{S}$ . (c–d) Mott–Schottky plots of WZ  $\text{Cd}_{0.7}\text{Zn}_{0.3}\text{S}$  and ZB  $\text{Cd}_{0.7}\text{Zn}_{0.3}\text{S}$  at different frequencies of 1500, 1000 and 500 Hz.

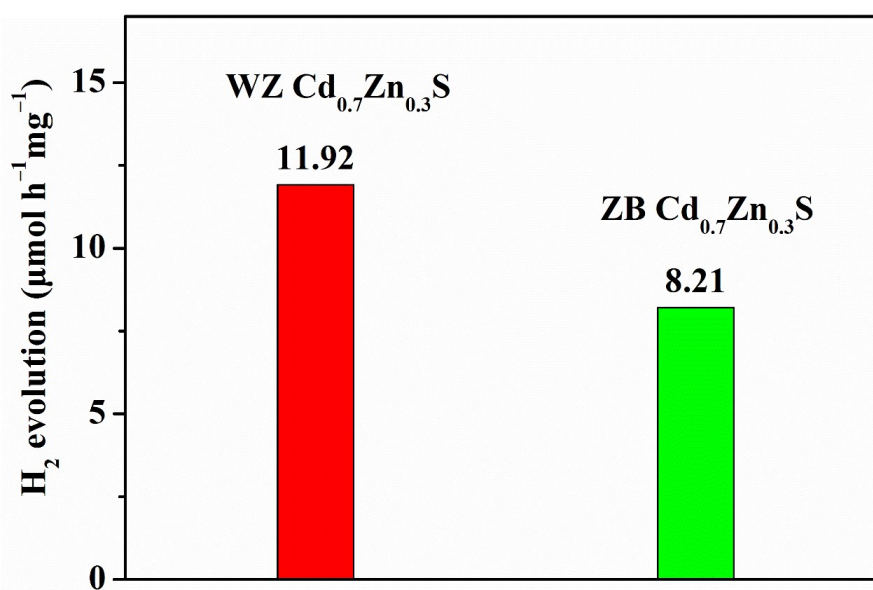

**Fig. S12** Photocatalytic  $\text{H}_2$ -evolution activities of WZ  $\text{Cd}_{0.7}\text{Zn}_{0.3}\text{S}$  and ZB  $\text{Cd}_{0.7}\text{Zn}_{0.3}\text{S}$ .

## Tables

**Table S1** EDX experimental data of nanoplates (Fig. 3g, Area 1#), nanopopcorns (Fig. 3g, Area 2#) and ZnS-16 (Fig. S3d, Area 3#).

| sample                    | Weight percentage (wt%) |       |       |       | Atomic percentage (at%) |       |       |       |
|---------------------------|-------------------------|-------|-------|-------|-------------------------|-------|-------|-------|
|                           | N                       | Cd    | Zn    | S     | N                       | Cd    | Zn    | S     |
| nanoplates<br>(Area 1#)   | 9.05                    | 10.04 | 51.35 | 29.55 | 25.45                   | 3.93  | 33.13 | 37.49 |
| nanopopcorns<br>(Area 2#) | 1.48                    | 49.86 | 13.98 | 34.68 | 5.43                    | 25.46 | 11.76 | 57.35 |
| ZnS-16<br>(Area 3#)       | 6.55                    | 1.06  | 60.45 | 31.93 | 18.72                   | 0.42  | 39.66 | 41.20 |

**Table S2** ICP-OES experimental data for Cd<sub>0.5</sub>Zn<sub>0.5</sub>S-16.

| sample                                   | Weight percentage (wt%) |       |       | Mole ratio |
|------------------------------------------|-------------------------|-------|-------|------------|
|                                          | Cd                      | Zn    | S     | Cd : Zn    |
| Cd <sub>0.5</sub> Zn <sub>0.5</sub> S-16 | 46.54                   | 27.36 | 14.81 | 1 : 1.01   |

**Table S3** Absolute fluorescence quantum yield ( $\Phi_f$ ) of Cd<sub>0.5</sub>Zn<sub>0.5</sub>S-10 and Cd<sub>0.5</sub>Zn<sub>0.5</sub>S-16.

| Sample       | Cd <sub>0.5</sub> Zn <sub>0.5</sub> S-10 | Cd <sub>0.5</sub> Zn <sub>0.5</sub> S-16 |
|--------------|------------------------------------------|------------------------------------------|
| $\Phi_f$ (%) | 1.47                                     | 0.21                                     |



**Table S4** Comparison of Cd<sub>1-x</sub>Zn<sub>x</sub>S phase junctions for photocatalytic H<sub>2</sub> evolution with Na<sub>2</sub>S/Na<sub>2</sub>SO<sub>3</sub> as sacrificial reagent.

| Photocatalyst                                          | Preparation method                 | Solvent/<br>Temperature                         | Activity (μmol h <sup>-1</sup> mg <sup>-1</sup> )                 | AQY% (420 nm) | Ref       |
|--------------------------------------------------------|------------------------------------|-------------------------------------------------|-------------------------------------------------------------------|---------------|-----------|
| ZB/WZ Cd <sub>1-x</sub> Zn <sub>x</sub> S nanopopcorns | solvothermal                       | en/180 °C                                       | 282.14 (λ≥420 nm)                                                 | 64.4          | This work |
| Cd <sub>0.5</sub> Zn <sub>0.5</sub> S nanorod          | microwave irradiation solvothermal | en+H <sub>2</sub> O/ 230 °C                     | 25.8 (λ≥430 nm)                                                   | 62            | 2         |
| Cd <sub>0.5</sub> Zn <sub>0.5</sub> S nanospheres      | solvothermal                       | en+H <sub>2</sub> O/ 180 °C                     | 83.5 (λ≥420 nm)                                                   | 47.5          | 3         |
| Cd <sub>1-x</sub> Zn <sub>x</sub> S                    | co-precipitation                   | H <sub>2</sub> O/25 °C                          | 30 (λ>400 nm) (Na <sub>2</sub> S-K <sub>2</sub> SO <sub>3</sub> ) | -             | 4         |
| Twin-Cd <sub>0.5</sub> Zn <sub>0.5</sub> S             | solvothermal                       | H <sub>2</sub> O/180 °C                         | 46.6 (λ>420 nm)                                                   | 6.6           | 5         |
| Cd <sub>0.7</sub> Zn <sub>0.3</sub> S                  | solvothermal                       | deta+H <sub>2</sub> O/ 180 °C                   | 31.3 (λ≥420 nm)                                                   | 65.7          | 6         |
| Cd <sub>0.5</sub> Zn <sub>0.5</sub> S nanoparticles    | hydrothermal                       | H <sub>2</sub> O/180 °C                         | 125.27 (λ≥420 nm)                                                 | 21.5          | 7         |
| Cd <sub>0.4</sub> Zn <sub>0.6</sub> S                  | reflux                             | H <sub>2</sub> O+oleylamine+octadecene / 230 °C | 1.93 (λ≥420 nm)                                                   | -             | 8         |
| Cd <sub>0.6</sub> Zn <sub>0.4</sub> S                  | solvothermal                       | H <sub>2</sub> O+TEOA/ 160 °C                   | 9.44 (λ>420 nm)                                                   | 9.8           | 9         |
| ZB-WZ Cd <sub>1-x</sub> Zn <sub>x</sub> S              | ultrasonic assisted precipitation  | ethanol/160 °C                                  | 9.8 (λ≥430 nm)                                                    | 48.7          | 10        |

**Table S5** Comparison of Cd<sub>1-x</sub>Zn<sub>x</sub>S-based catalysts for photocatalytic H<sub>2</sub> evolution.

| Photocatalyst                                                                     | Light source (Xe lamp)        | Sacrificial reagent                               | Activity ( $\mu\text{mol h}^{-1} \text{mg}^{-1}$ ) | AQY% (420 nm) | Ref       |
|-----------------------------------------------------------------------------------|-------------------------------|---------------------------------------------------|----------------------------------------------------|---------------|-----------|
| ZB/WZ Cd <sub>1-x</sub> Zn <sub>x</sub> S nanopopcorns                            | $\lambda \geq 420 \text{ nm}$ | Na <sub>2</sub> S-Na <sub>2</sub> SO <sub>3</sub> | 282.14                                             | 64.4          | This work |
| Zn <sub>0.5</sub> Cd <sub>0.5</sub> S                                             | $\lambda \geq 400 \text{ nm}$ | Na <sub>2</sub> S-Na <sub>2</sub> SO <sub>3</sub> | 7.42                                               | 9.6           | 11        |
| Twin-Zn <sub>0.5</sub> Cd <sub>0.5</sub> S                                        | $\lambda \geq 430 \text{ nm}$ | Na <sub>2</sub> S-Na <sub>2</sub> SO <sub>3</sub> | 17.9                                               | 43 (425 nm)   | 12        |
| NiS <sub>x</sub> -Zn <sub>0.5</sub> Cd <sub>0.5</sub> S                           | $\lambda \geq 430 \text{ nm}$ | Na <sub>2</sub> S-Na <sub>2</sub> SO <sub>3</sub> | 44.6                                               | 100 (425 nm)  | 13        |
| Zn <sub>0.5</sub> Cd <sub>0.5</sub> S/<br>PdP <sub>-0.33</sub> S <sub>-1.67</sub> | $\lambda > 420 \text{ nm}$    | Na <sub>2</sub> S-Na <sub>2</sub> SO <sub>3</sub> | 246                                                | 16.5          | 5         |
|                                                                                   |                               | Ascorbic acid                                     | 372                                                | 19.7          |           |
| Cd <sub>0.5</sub> Zn <sub>0.5</sub> S nanorod                                     | $\lambda \geq 430 \text{ nm}$ | Na <sub>2</sub> S-Na <sub>2</sub> SO <sub>3</sub> | 25.8                                               | 62 (425 nm)   | 2         |
| Cu <sub>1.94</sub> S-Zn <sub>x</sub> Cd <sub>1-x</sub> S                          | $\lambda > 420 \text{ nm}$    | Na <sub>2</sub> S-Na <sub>2</sub> SO <sub>3</sub> | 7.74                                               | 8.5           | 14        |
| Pt/Cu <sub>1.94</sub> S-Zn <sub>x</sub> Cd <sub>1-x</sub> S                       | $\lambda > 420 \text{ nm}$    | Na <sub>2</sub> S-Na <sub>2</sub> SO <sub>3</sub> | 13.53                                              | 26.4          | 14        |
| NiS/Zn <sub>0.5</sub> Cd <sub>0.5</sub> S                                         | $\lambda > 420 \text{ nm}$    | Na <sub>2</sub> S-Na <sub>2</sub> SO <sub>3</sub> | 16.78                                              | -             | 15        |
| Zn <sub>1-x</sub> Cd <sub>x</sub> S/ D-ZnS(en) <sub>0.5</sub>                     | $\lambda > 420 \text{ nm}$    | Na <sub>2</sub> S-Na <sub>2</sub> SO <sub>3</sub> | 15.5                                               | 50 (440 nm)   | 16        |
| Zn <sub>0.5</sub> Cd <sub>0.5</sub> S@HNTs-10                                     | $\lambda > 400 \text{ nm}$    | Na <sub>2</sub> S-Na <sub>2</sub> SO <sub>3</sub> | 25.67                                              | 32.3          | 17        |
| Pt-PdS/<br>Zn <sub>0.5</sub> Cd <sub>0.5</sub> S-P                                | $\lambda > 420 \text{ nm}$    | Na <sub>2</sub> S-Na <sub>2</sub> SO <sub>3</sub> | ~ 7                                                | 89            | 18        |
| Ni <sub>2</sub> P/ Zn <sub>0.5</sub> Cd <sub>0.5</sub> S                          | $\lambda > 420 \text{ nm}$    | Na <sub>2</sub> S-Na <sub>2</sub> SO <sub>3</sub> | 23.44                                              | 19            | 19        |
| Cd <sub>0.5</sub> Zn <sub>0.5</sub> S/TNTs                                        | $\lambda > 430 \text{ nm}$    | Na <sub>2</sub> S-Na <sub>2</sub> SO <sub>3</sub> | 1.74                                               | 38.1          | 20        |
| Hollow Zn <sub>0.6</sub> Cd <sub>0.4</sub> S cage                                 | $\lambda > 420 \text{ nm}$    | Na <sub>2</sub> S-Na <sub>2</sub> SO <sub>3</sub> | 5.68                                               | -             | 21        |

|                                                                                 |                       |                                                                 |       |                  |    |
|---------------------------------------------------------------------------------|-----------------------|-----------------------------------------------------------------|-------|------------------|----|
| Twin-Cd <sub>1-x</sub> Zn <sub>x</sub> S/<br>MoS <sub>2</sub>                   | $\lambda > 420$ nm    | Na <sub>2</sub> S-Na <sub>2</sub> SO <sub>3</sub>               | 69.25 | 55.2             | 22 |
|                                                                                 |                       | Lactic acid                                                     | 37.22 | 36.3             |    |
| Pt/Zn <sub>x</sub> Cd <sub>1-x</sub> S<br>hollow<br>nanospheres                 | $\lambda > 420$ nm    | Lactic acid                                                     | 4.11  | ~ 23             | 23 |
| Ni <sub>x</sub> Co <sub>1-x</sub> /<br>Zn <sub>0.75</sub> Cd <sub>0.25</sub> S  | $\lambda > 420$ nm    | Na <sub>2</sub> S-<br>Na <sub>2</sub> SO <sub>3</sub> -<br>TEOA | 84.7  | 13.3<br>(365 nm) | 24 |
| Ni/NiS/<br>Zn <sub>0.2</sub> Cd <sub>0.8</sub> S                                | $\lambda \geq 420$ nm | Lactic acid                                                     | 4.15  | 11.1             | 25 |
| Zn <sub>0.5</sub> Cd <sub>0.5</sub> S@<br>PAN                                   | $\lambda \geq 420$ nm | Na <sub>2</sub> S-Na <sub>2</sub> SO <sub>3</sub>               | 9.5   | 27.4             | 26 |
| Pt/Twin-<br>Cd <sub>1-x</sub> Zn <sub>x</sub> S                                 | $\lambda > 400$ nm    | ascorbic acid                                                   | 5.5   | 8.6              | 27 |
| Zn <sub>0.8</sub> Cd <sub>0.2</sub> S@g-<br>C <sub>3</sub> N <sub>4</sub>       | $\lambda \geq 420$ nm | Na <sub>2</sub> S-Na <sub>2</sub> SO <sub>3</sub>               | 23.51 | 1.4              | 28 |
| Pt/Cd <sub>0.5</sub> Zn <sub>0.5</sub> S/<br>BiVO <sub>4</sub>                  | $\lambda > 420$ nm    | Na <sub>2</sub> S-Na <sub>2</sub> SO <sub>3</sub>               | 2.35  | 24.1             | 29 |
| Twin-Cd <sub>0.5</sub> Zn <sub>0.5</sub> S/<br>CoO                              | $\lambda > 420$ nm    | Na <sub>2</sub> S-Na <sub>2</sub> SO <sub>3</sub>               | 178   | 37.1             | 30 |
| MoS <sub>2</sub> -Cd <sub>0.5</sub> Zn <sub>0.5</sub> S                         | $\lambda \geq 420$ nm | Lactic acid                                                     | 11.49 | 1.3              | 31 |
| CoFe <sub>2</sub> O <sub>4</sub> /<br>Cd <sub>0.9</sub> Zn <sub>0.1</sub> S     | $\lambda > 400$ nm    | Na <sub>2</sub> S-Na <sub>2</sub> SO <sub>3</sub>               | 3.5   | 27               | 32 |
| Zn <sub>0.5</sub> Cd <sub>0.5</sub> S/<br>Ni <sub>0.1</sub> Co <sub>0.9</sub> P | $\lambda > 400$ nm    | Na <sub>2</sub> S-Na <sub>2</sub> SO <sub>3</sub>               | 19.52 | 19.7             | 33 |
| Cu-doped<br>Zn <sub>0.5</sub> Cd <sub>0.5</sub> S                               | $\lambda \geq 420$ nm | Na <sub>2</sub> S-Na <sub>2</sub> SO <sub>3</sub>               | 21.4  | 18.8(428 nm)     | 34 |
| Zn-Cd-S (surface<br>defects)                                                    | $\lambda > 420$ nm    | Na <sub>2</sub> S-Na <sub>2</sub> SO <sub>3</sub>               | 11.42 | 16.9             | 35 |

|                                                                                         |                       |                                                   |        |      |    |
|-----------------------------------------------------------------------------------------|-----------------------|---------------------------------------------------|--------|------|----|
| BP <sub>x</sub> /Zn <sub>0.5</sub> Cd <sub>0.5</sub> S                                  | $\lambda > 420$ nm    | Na <sub>2</sub> S-Na <sub>2</sub> SO <sub>3</sub> | 137.17 | 36.3 | 36 |
| Cd <sub>1-x</sub> Zn <sub>x</sub> S /CdS                                                | $\lambda \geq 420$ nm | Na <sub>2</sub> S-Na <sub>2</sub> SO <sub>3</sub> | 133.5  | 50.1 | 37 |
| Cd <sub>1-x</sub> Zn <sub>x</sub> S@ O-MoS <sub>2</sub> /Ni <sub>2</sub> O <sub>3</sub> | $\lambda > 420$ nm    | Na <sub>2</sub> S-Na <sub>2</sub> SO <sub>3</sub> | 223.17 | 64.1 | 38 |
|                                                                                         |                       | Lactic acid                                       | 66.08  | 41.2 |    |

## References

- 1 W. H. Feng, Z. B. Fang, B. Wang, L. L. Zhang, Y. Zhang, Y. Yang, M. L. Huang, S. X. Weng and P. Liu, *J. Mater. Chem. A*, 2017, **5**, 1387-1393.
- 2 M. Liu, D. Jing, Z. Zhou and L. Guo, *Nat. Commun.*, 2013, **4**, 2278.
- 3 J. G. Song, R. R. Sun, Y. L. Chen, D. J. Sun and X. Y. Li, *Int. J. Hydrogen Energy*, 2018, **43**, 18220-18231.
- 4 Y. Y. Hsu, N. T. Suen, C. C. Chang, S. F. Hung, C. L. Chen, T. S. Chan, C. L. Dong, C. C. Chan, S. Y. Chen and H. M. Chen, *ACS Appl. Mater. Interfaces*, 2015, **7**, 22558-22569.
- 5 J. Song, H. Zhao, R. Sun, X. Li and D. Sun, *Energy Environ. Sci.*, 2017, **10**, 225-235.
- 6 H. Du, K. Liang, C. Z. Yuan, H. L. Guo, X. Zhou, Y. F. Jiang and A. W. Xu, *ACS Appl. Mater. Interfaces*, 2016, **8**, 24550-24558.
- 7 R. Sun, J. Song, H. Zhao and X. Li, *Mater. Charact.*, 2018, **144**, 57-65.
- 8 X. Zhao, Z. M. Luo, T. J. Hei and Y. W. Jiang, *J. Photochem. Photobiol., A*, 2019, **382**, 111919.
- 9 J. Wang, Y. Ma, X. Jiang and H. Du, *J. Alloys Compd.*, 2021, **854**, 156850.
- 10 K. Zhang, Y. Dai, Z. Zhou, S. Ullah Jan, L. Guo and J. R. Gong, *Nano Energy*, 2017, **41**, 101-108.
- 11 Q. Li, H. Meng, P. Zhou, Y. Zheng, J. Wang, J. Yu and J. Gong, *ACS Catal.*, 2013, **3**, 882-889.
- 12 M. C. Liu, L. Z. Wang, G. Q. Lu, X. D. Yao and L. J. Guo, *Energy Environ. Sci.*, 2011, **4**, 1372-1378.
- 13 M. C. Liu, Y. B. Chen, J. Z. Su, J. W. Shi, X. X. Wang and L. J. Guo, *Nature Energy*, 2016, **1**, 16151.
- 14 Y. G. Chen, S. Zhao, X. Wang, Q. Peng, R. Lin, Y. Wang, R. A. Shen, X. Cao, L. B. Zhang, G. Zhou, J. Li, A. D. Xia and Y. D. Li, *J. Am. Chem. Soc.*, 2016, **138**, 4286-4289.
- 15 X. X. Zhao, J. R. Feng, J. Liu, W. Shi, G. M. Yang, G. C. Wang and P. Cheng, *Angew. Chem., Int. Ed.*, 2018, **57**, 9790-9794.
- 16 W. H. Feng, Y. Z. Wang, X. Y. Huang, K. Q. Wang, F. Gao, Y. Zhao, B. Wang, L. L. Zhang and P. Liu, *Appl. Catal., B*, 2018, **220**, 324-336.
- 17 S. Lin, Y. H. Zhang, Y. You, C. Zeng, X. Xiao, T. Y. Ma and H. W. Huang, *Adv. Funct. Mater.*, 2019, **29**, 1903825.
- 18 K. Khan, X. P. Tao, M. Shi, B. Zeng, Z. C. Feng, C. Li and R. G. Li, *Adv. Funct. Mater.*, 2020, **30**, 2003731.
- 19 D. S. Dai, L. Wang, N. Xiao, S. S. Li, H. Xu, S. Liu, B. R. Xu, D. Lv, Y. Q. Gao, W. Y. Song, L. Ge and J. Liu, *Appl. Catal., B*, 2018, **233**, 194-201.

- 20 Y. B. Chen and L. J. Guo, *J. Mater. Chem.*, 2012, **22**, 7507-7514.
- 21 J. M. Chen, J. Y. Chen and Y. W. Li, *J. Mater. Chem. A*, 2017, **5**, 24116-24125.
- 22 Y. Y. Li, B. W. Sun, H. F. Lin, Q. Q. Ruan, Y. L. Geng, J. Liu, H. Wang, Y. Yang, L. Wang and K. C. Tam, *Appl. Catal., B*, 2020, **267**, 118702.
- 23 C. Y. Zhang, H. H. Liu, W. N. Wang, H. S. Qian, S. Cheng, Y. Wang, Z. B. Zha, Y. J. Zhong and Y. Hu, *Appl. Catal., B*, 2018, **239**, 309-316.
- 24 X. Z. Yue, S. S. Yi, R. W. Wang, Z. T. Zhang and S. L. Qiu, *Appl. Catal., B*, 2018, **224**, 17-26.
- 25 Y. Sun, C. Xu, H. Ma, G. Li, L. Chen, Y. Sun, Z. Chen, P. Fang, Q. Fu and C. Pan, *Chem. Eng. J.*, 2021, **406**, 126878.
- 26 J. W. Fu, B. C. Zhu, W. You, M. Jaroniec and J. G. Yu, *Appl. Catal., B*, 2018, **220**, 148-160.
- 27 B. J. Ng, L. K. Putri, X. Y. Kong, K. P. Y. Shak, P. Pasbakhsh, S. P. Chai and A. R. Mohamed, *Appl. Catal., B*, 2018, **224**, 360-367.
- 28 F. Y. Tian, D. F. Hou, F. Tang, M. Deng, X. Q. Qiao, Q. C. Zhang, T. Wu and D. S. Li, *J. Mater. Chem. A*, 2018, **6**, 17086-17094.
- 29 C. Zeng, Y. M. Hu, T. R. Zhang, F. Dong, Y. H. Zhang and H. W. Huang, *J. Mater. Chem. A*, 2018, **6**, 16932-16942.
- 30 H. T. Zhao, L. Y. Guo, C. W. Xing, H. Y. Liu and X. Y. Li, *J. Mater. Chem. A*, 2020, **8**, 1955-1965.
- 31 S. J. Zhao, J. J. Huang, Q. Y. Huo, X. Z. Zhou and W. X. Tu, *J. Mater. Chem. A*, 2016, **4**, 193-199.
- 32 Z. W. Shao, T. T. Zeng, Y. N. He, D. F. Zhang and X. P. Pu, *Chem. Eng. J.*, 2019, **359**, 485-495.
- 33 S. S. Li, L. Wang, N. Xiao, A. X. Wang, X. L. Li, Y. Q. Gao, N. Li, W. Y. Song, L. Ge and J. Liu, *Chem. Eng. J.*, 2019, **378**, 122220.
- 34 Z. W. Mei, B. K. Zhang, J. X. Zheng, S. Yuan, Z. Q. Zhuo, X. G. Meng, Z. H. Chen, K. Amine, W. L. Yang, L. W. Wang, W. Wang, S. F. Wang, Q. H. Gong, J. Li, F. S. Liu and F. Pan, *Nano Energy*, 2016, **26**, 405-416.
- 35 X. Y. Zhang, Z. Zhao, W. W. Zhang, G. Q. Zhang, D. Qu, X. Miao, S. R. Sun and Z. C. Sun, *Small*, 2016, **12**, 793-801.
- 36 H. T. Zhao, H. Y. Liu, R. R. Sun, Y. L. Chen and X. Y. Li, *Chemcatchem*, 2018, **10**, 4395-4405.
- 37 K. Li, R. Chen, S. L. Li, S. L. Xie, L. Z. Dong, Z. H. Kang, J. C. Bao and Y. Q. Lan, *ACS Appl. Mater. Interfaces*, 2016, **8**, 14535-14541.
- 38 H. F. Lin, B. W. Sun, H. Wang, Q. Q. Ruan, Y. L. Geng, Y. Y. Li, J. K. Wu, W. J. Wang, J. Liu and X. Wang, *Small*, 2019, **15**, 1804115.
